# Supplementary material
Source: PubMed Central journal article supplement (PMC3037537)
Supplement: nucl0105_0412SD1.pdf [file nucl0105_0412SD1.pdf]

| Species                      | mRNA and protein NCBI or Ensembl ID     |                                          |
|------------------------------|-----------------------------------------|------------------------------------------|
|                              | CBP20L                                  | CBP20S                                   |
| <i>Homo sapiens</i>          | NM_007362.3<br>NP_031388.2              | NM_001042540.1<br>NP_001036005.1         |
| <i>Pan troglodytes</i>       | XM_516977.2<br>XP_01165488.1            | XM_001165488.1<br>XP_001165488.1         |
| <i>Macaca mulata</i>         | ENSMUT00000010957<br>ENSMMUP00000010278 | XM_001096719.1<br>XP_001096719.1         |
| <i>Sus scrofa</i>            | XM_001928691.1<br>XP_001928726.1        | XM_001928701.1<br>XP_001928736.1         |
| <i>Equus caballus</i>        | XM_001501008.1<br>XP_001501058.1        | XM_001501017.1<br>XP_001501067.1         |
| <i>Monodelphis domestica</i> | XM_001367619.1<br>XP_001367656.1        | XM_001367664.1<br>XP_001367701.1         |
| <i>Mus musculus</i>          | NM_026554.3<br>NP_080830.1              | ENSMUST00000115178<br>ENSMUSP00000110832 |

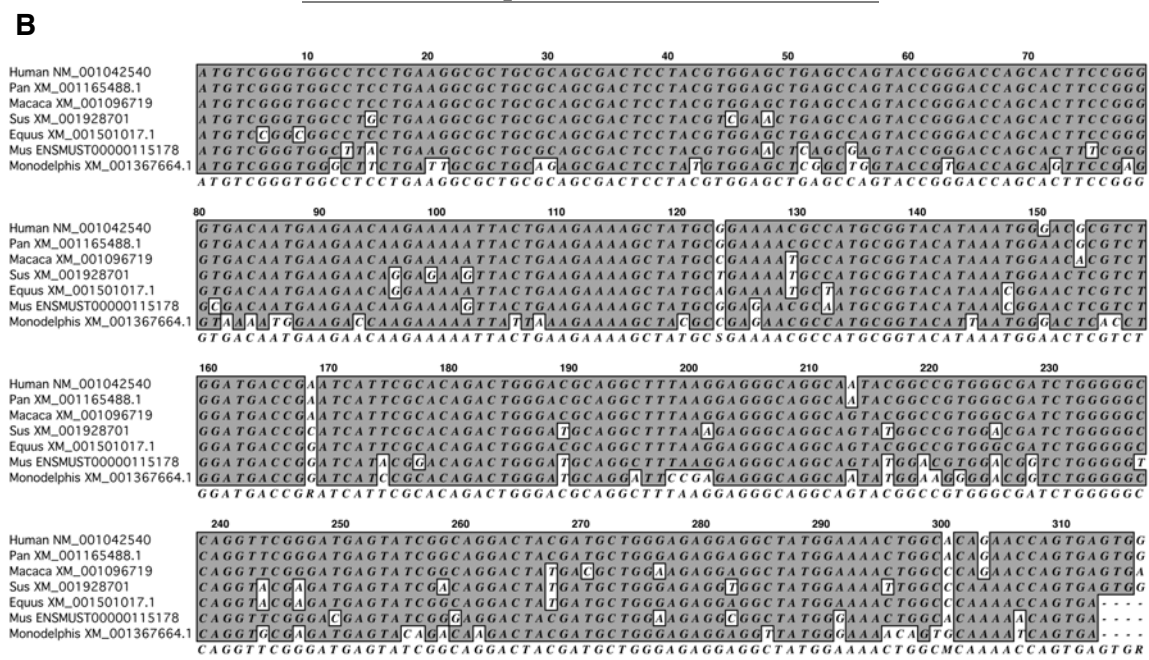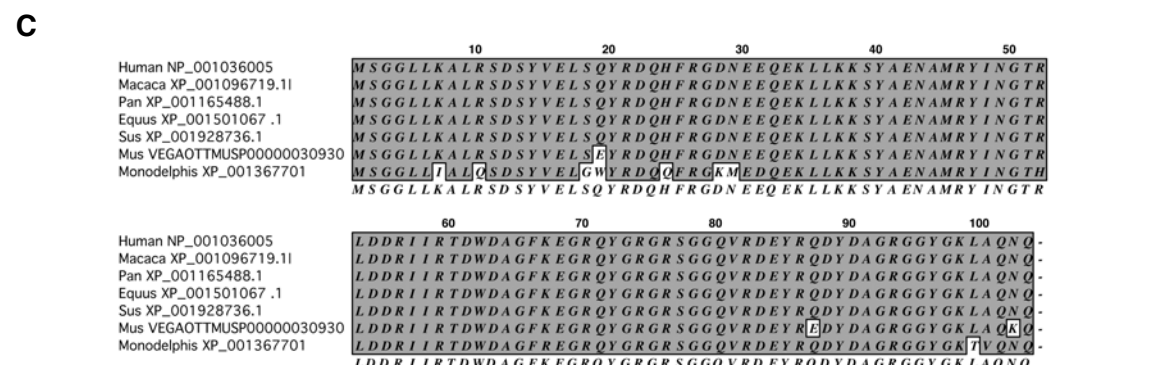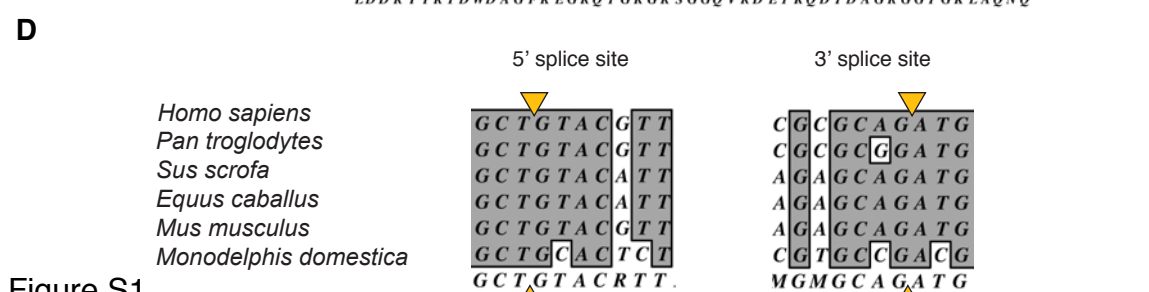

Figure S1

**Supplementary Figure 1. Sequence alignment of CBP20S RNA and protein found in mammalian species.**

(A) A Blast search (<http://blast.ncbi.nlm.nih.gov/Blast.cgi>) was conducted to find CBP20S in other species. A tabular summary of the results is presented, showing the species where CBP20S ESTs were found. (B and C) CBP20S mRNA (A) and protein (B) sequences from all seven species were aligned, using MacVector. (D) Alignment of 5' and 3' splice sites used in the alternative splicing event leading to CBP20S formation. Yellow arrowheads indicate the conserved cleavage sites.
